# Supplementary material for: The myeloid mineralocorticoid receptor regulates dermal angiogenesis and inflammation in glucocorticoid‐induced impaired wound healing
Source: PubMed Central journal article supplement (PMC9826027; doi:10.1111/bph.15932), 2022-09-02
Supplement: BPH-179-5222-s001.pdf [file BPH-179-5222-s001.pdf]

## SUPPLEMENTARY FIGURES

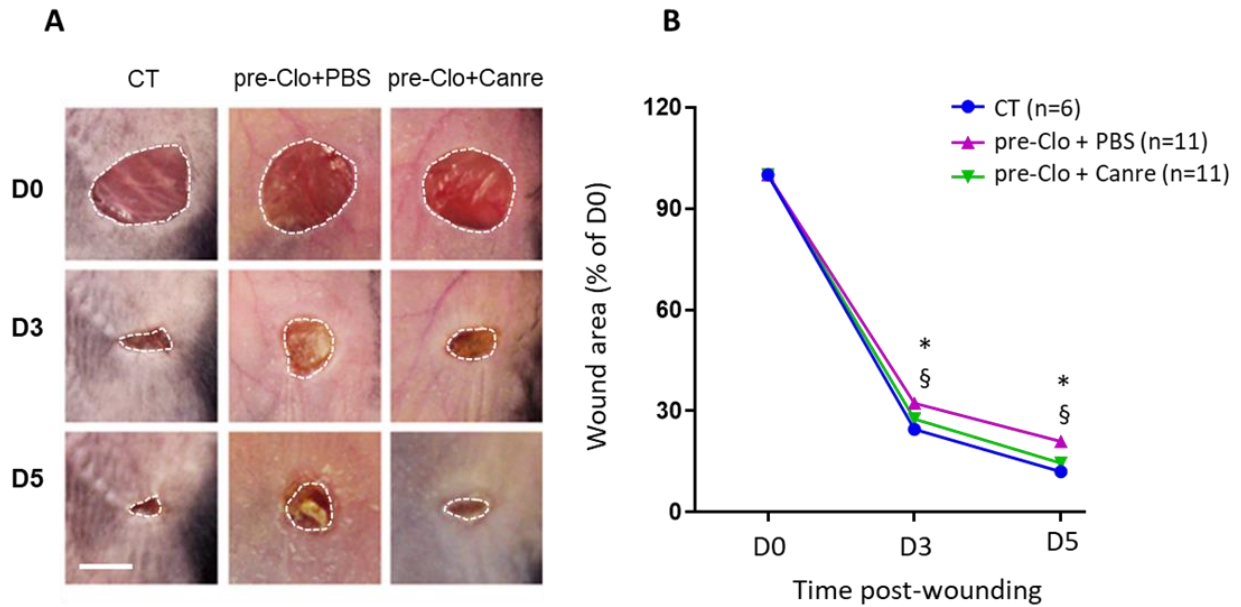

**Figure S1. MR antagonist rescues clobetasol induced wound healing delayed in mouse skin.**

Photographs (**A**) and (**B**) quantification wound area from mice with and without pretreated 10 days with clobetasol and treated with Canrenoate (Canre) or PBS at different time point post wounding. Data represent mean  $\pm$  SEM; n= number of mice per group. Statistics: (**B**) two-way ANOVA test followed by the Newman-Keuls Multiple Comparison test.  $*p < 0.05$  for pre-Clo + PBS vs CT.  $\$p < 0.05$  for pre-Clo + PBS vs pre-Clo + Canre, ns = not significant. ANOVA, analysis of variance; CT, control; Canre, potassium canrenoate; PBS, phosphate buffered saline; SEM, standard error of the mean; pre, pretreated; Clo, clobetasol; D0, day 0; D3, day 3; D5, day 5. Scale bar = 100  $\mu$ m.

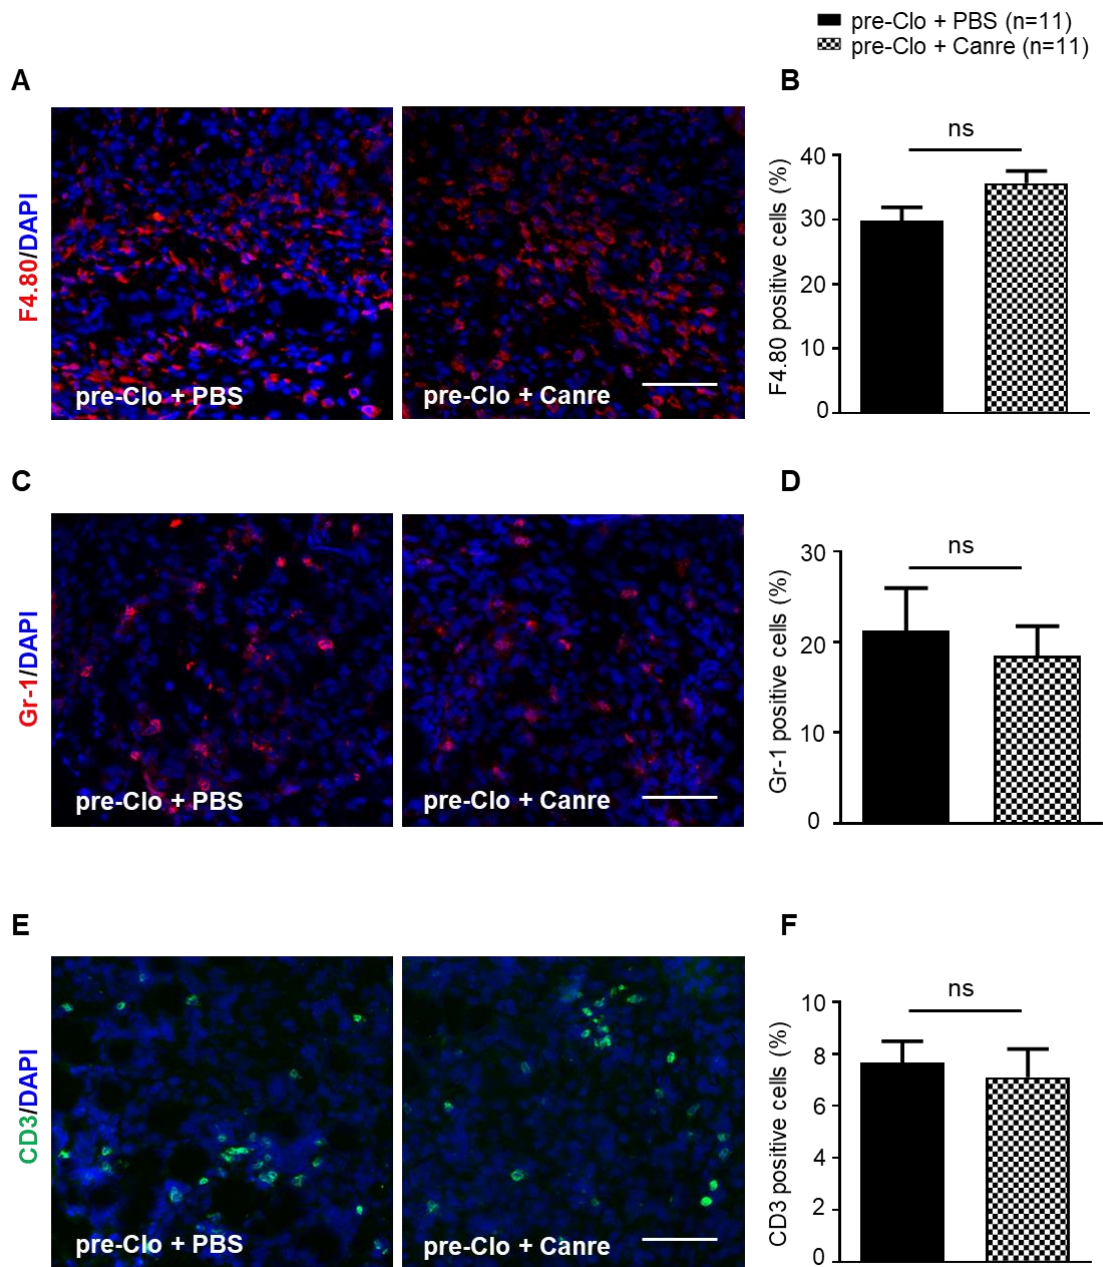

**Figure S2. Canrenoate does not modify the recruitment of inflammatory cells in clobetasol pre-treated skin.**

Photographs of wound sections at day 5 post-wounding labelled with (A) anti- F4.80; (C) anti-Gr-1 and (E) anti-CD3 antibodies, showing neutrophils, macrophages, lymphocyte T cells in granulation tissue of mice pre-treated clobetasol and (B, D, F) quantification of these cells in granulation tissue of wounds at day 5 after treatment with Canre or PBS. Data present mean  $\pm$  SEM, n= number of mice per group, from 2 experimental series. Differences between the means

of two groups were assessed using a non-parametric Mann-Whitney test. *ns*: not significant. PBS, phosphate buffered saline; Canre, potassium canrenoate; DAPI, 4,6-diamidino-2-phenylindole; SEM, standard error of the mean; pre, pretreated; Clo, clobetasol. Scale bar = 100  $\mu\text{m}$

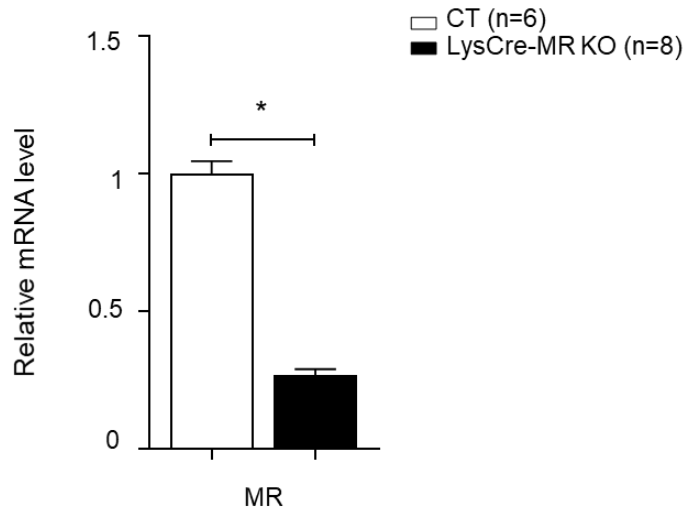

**Figure S3. MR mRNA expressed low level in macrophages of LysCre-MR KO mice model.**

The expression level of MR mRNA is decreased in macrophages from the LysCre-MR KO mice model compared with CT mice. Data present mean  $\pm$  SEM, n = number of mice per group. Differences between the means of two groups were assessed using a non-parametric Mann-Whitney test.  $*p < 0.05$ , MR, mineralocorticoid receptor; CT, control; KO, knockout; SEM, standard error of the mean.

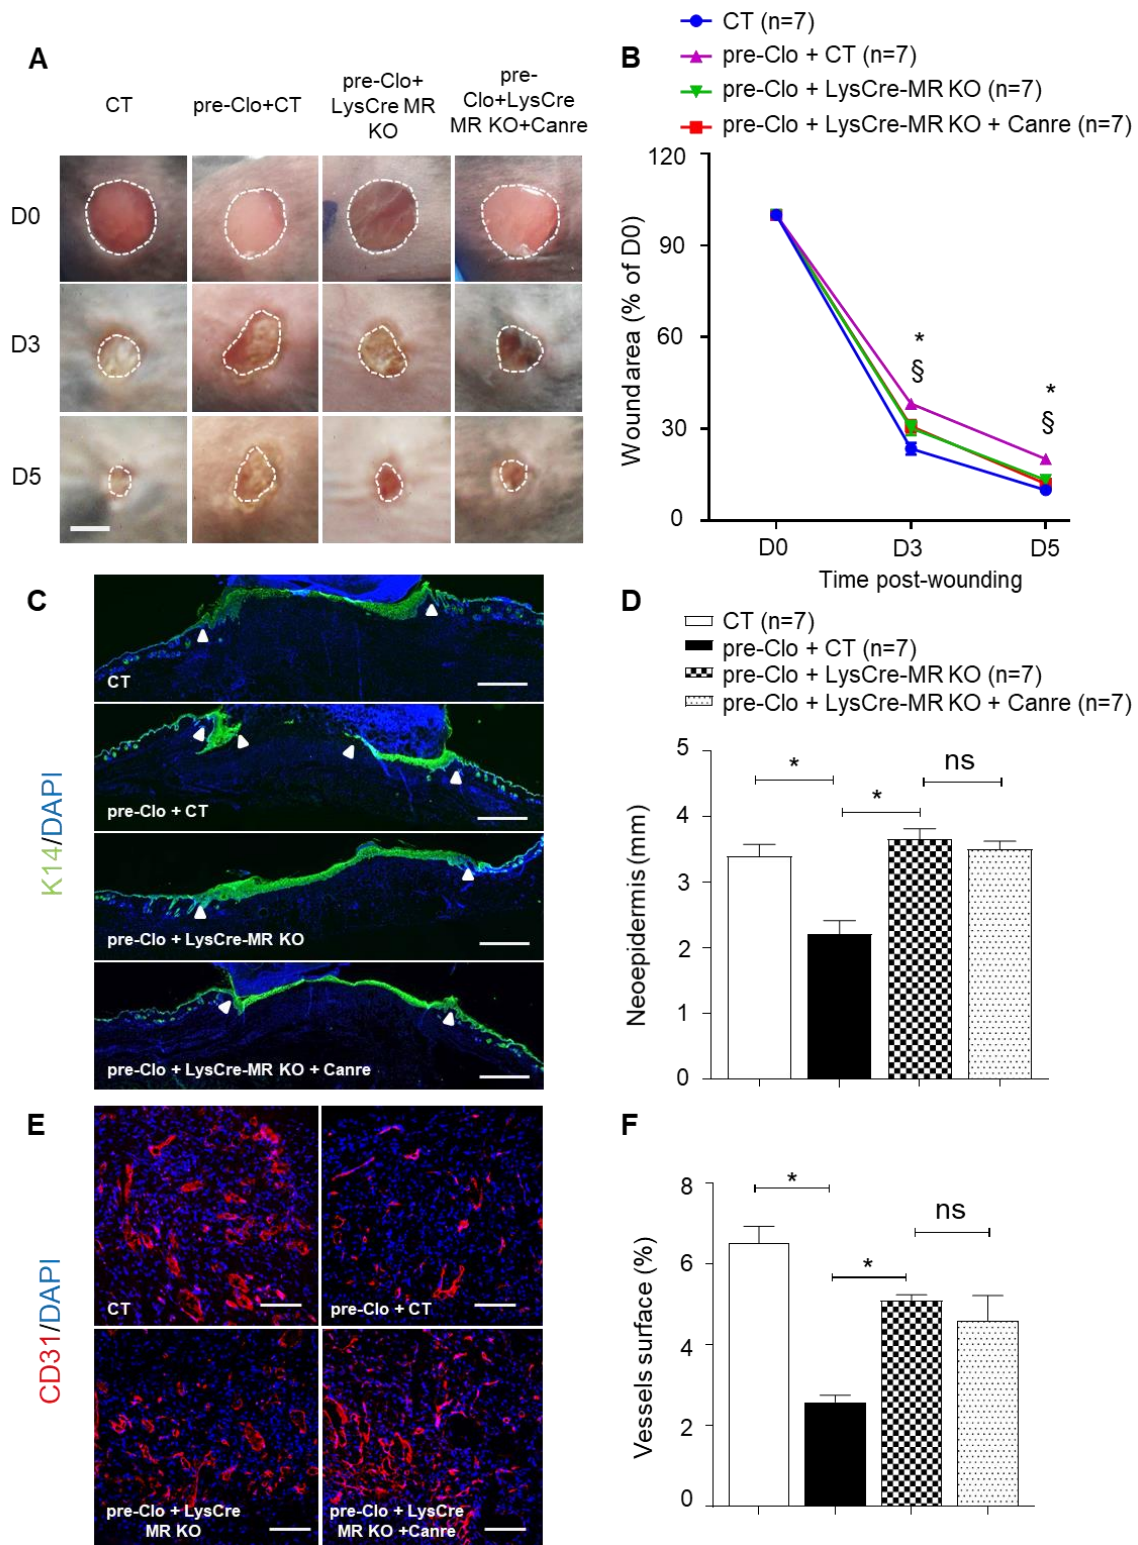

**Figure S4. Canrenoate does not give additional effect on wound healing of myeloid mineralocorticoid receptor deficiency mice pretreated with clobetasol.**

(A) Images and (B) quantification of the wound area from CT or LysCre-MR KO mice with or without clobetasol pretreatment before wounding and canrenoate treatment post-wounding, at

the different time points post-wounding. **(C)** Photographs of wound sections at day 5 post-wounding labeled with anti-K14 antibody (green) and DAPI (blue). **(D)** Quantification of the length of the neo-epidermis. **(E)** Photographs of wound sections stained for CD31 (red), showing neo-microvessels formed in wound beds. **(F)** Quantification of CD31<sup>+</sup> microvessels surface in the granulation tissue of wounds. Data represent mean  $\pm$  SEM; n= number of mice per group. Statistics: **(B)**: two-way ANOVA; **(D)**, **(F)**: one-way ANOVA test followed by the Newman-Keuls Multiple Comparison test. \* $p < 0.05$  for CT + Clo vs CT. § $p < 0.05$  for CT + Clo vs LysCre-MR KO + Clo, *ns = not significant*. ANOVA, analysis of variance; K14, keratin-14; DAPI, 4,6-diamidino-2-phenylindole; MR, mineralocorticoid receptor; CT, control; Canre, potassium canrenoate; SEM, standard error of the mean; pre, pretreated; Clo, clobetasol; KO, knockout; D0, day 0; D3, day 3; D5, day 5. Scale bar = 100  $\mu$ m
